# Supplementary material for: Leptin/OB-R pathway promotes IL-4 secretion from B lymphocytes and induces salivary gland epithelial cell apoptosis in Sjögren's syndrome
Source: PubMed Central journal article supplement (PMC5609933; doi:10.18632/oncotarget.18823), 2017-06-28
Supplement: oncotarget-08-63417-s001.pdf [file oncotarget-08-63417-s001.pdf]

# Leptin/OB-R pathway promotes IL-4 secretion from B lymphocytes and induces salivary gland epithelial cell apoptosis in Sjögren's syndrome

## SUPPLEMENTARY MATERIALS

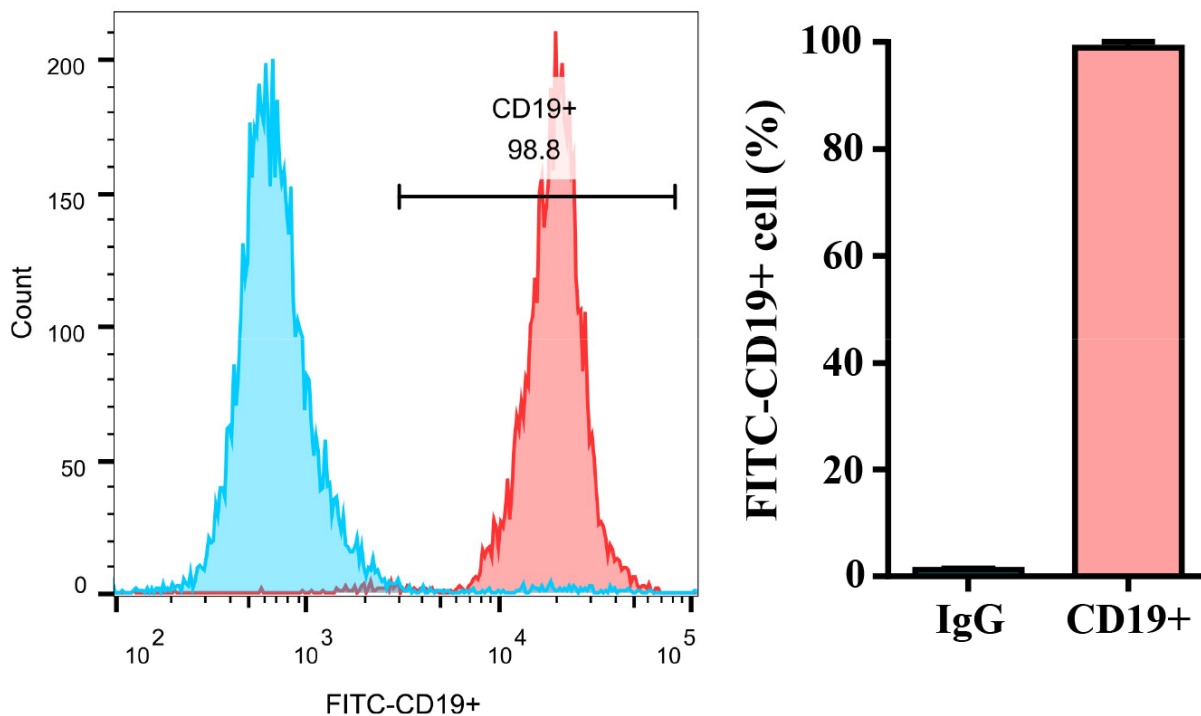

Supplementary Figure 1: Flow cytometric analysis of primary B lymphocytes stained with anti-CD19 PE antibody to assess purity.

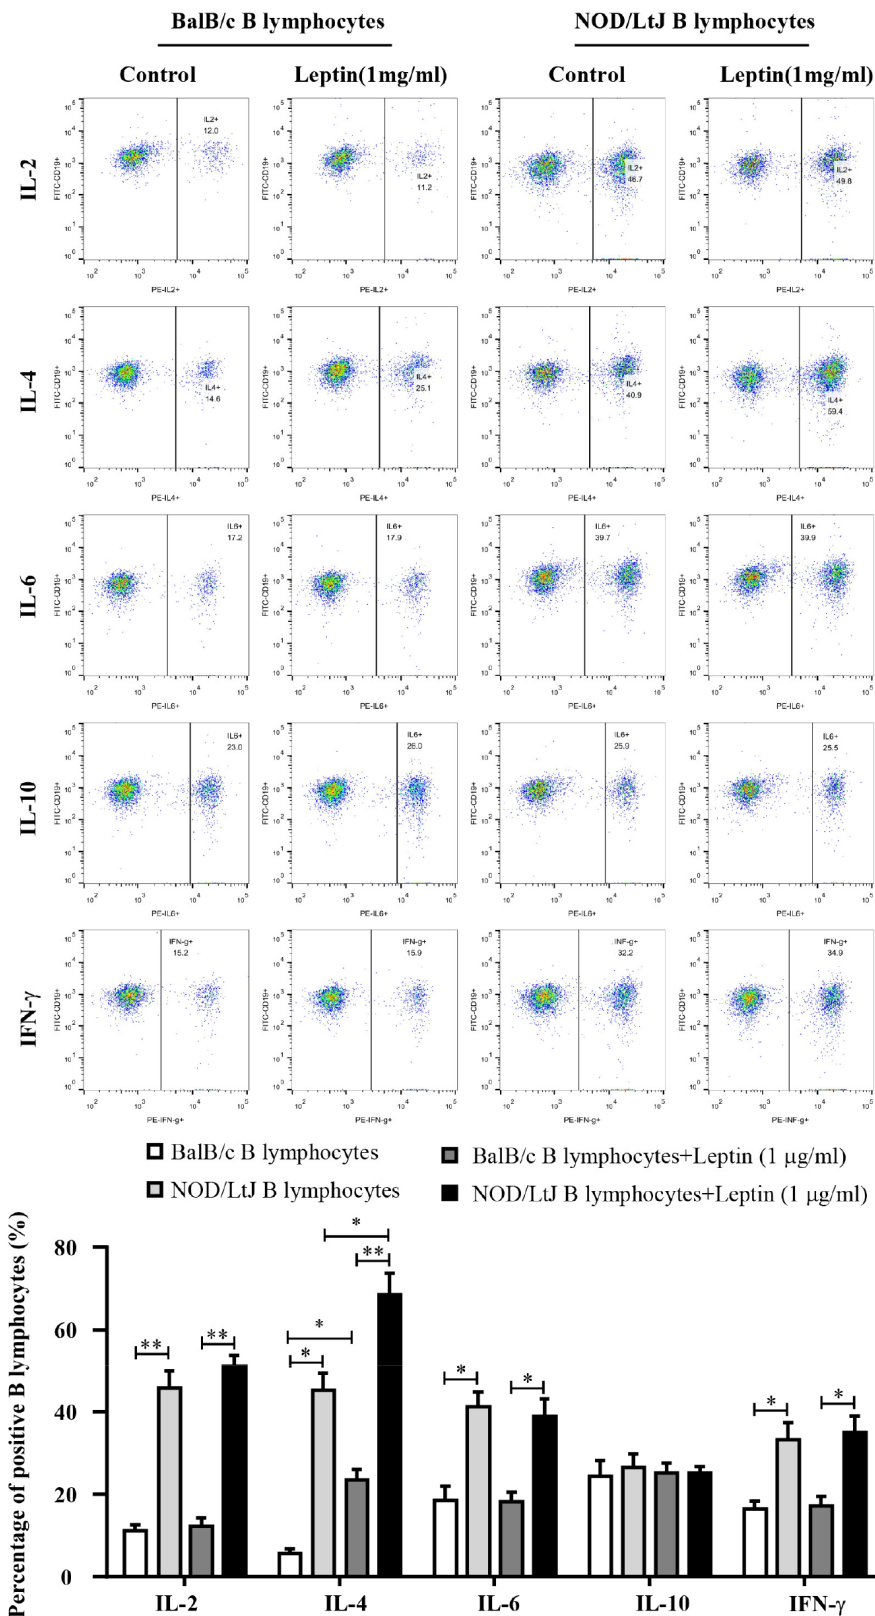

Supplementary Figure 2: Flow cytometric analysis of primary B lymphocytes stained with specific antibodies to assess the intracellular expression of cytokines (IL-2, IL-4, IL-6, IL-10, and IFN- γ).
